# Supplementary material
Source: MDPI journal article supplement (https://www.mdpi.com/2304-6740/10/10/163)
Supplement: s1 [file s1 › inorganics-1915615-supplementary.pdf]

Supporting information

# **Aliphatic-Bridged Early Lanthanide MOFs: Topological Polymorphism and Excitation-Dependent Luminescence**

**Pavel A. Demakov, Alexey A. Ryadun, Vladimir P. Fedin**

Nikolaev Institute of Inorganic Chemistry SB RAS, 3 Lavrentiev ave., Novosibirsk 630090, Russia

## Single crystal X-ray diffraction details

Table S1. Single crystal XRD experiment and refinement details for **1**, **2<sub>Ce</sub>**, **2<sub>Pr</sub>**.

|                                                              | <b>1</b>                                                                       | <b>2<sub>Ce</sub></b>                                                                      | <b>2<sub>Pr</sub></b>                                                                      |
|--------------------------------------------------------------|--------------------------------------------------------------------------------|--------------------------------------------------------------------------------------------|--------------------------------------------------------------------------------------------|
| Chemical formula                                             | C <sub>30</sub> H <sub>54</sub> La <sub>2</sub> N <sub>2</sub> O <sub>19</sub> | C <sub>50.25</sub> H <sub>51.25</sub> Ce <sub>2</sub> N <sub>4.75</sub> O <sub>12.75</sub> | C <sub>50.25</sub> H <sub>51.25</sub> N <sub>4.75</sub> O <sub>12.75</sub> Pr <sub>2</sub> |
| <i>M<sub>r</sub></i> , g/mol                                 | 1024.57                                                                        | 1205.95                                                                                    | 1207.53                                                                                    |
| Crystal system                                               | Triclinic                                                                      | Monoclinic                                                                                 | Monoclinic                                                                                 |
| Space group                                                  | <i>P</i> $\bar{1}$                                                             | <i>P</i> 2 <sub>1</sub> / <i>n</i>                                                         | <i>P</i> 2 <sub>1</sub> / <i>n</i>                                                         |
| Temperature, K                                               | 170                                                                            | 292                                                                                        | 170                                                                                        |
| <i>a</i> , Å                                                 | 9.0209(6)                                                                      | 10.5829(3)                                                                                 | 10.5217(4)                                                                                 |
| <i>b</i> , Å                                                 | 10.5442(7)                                                                     | 17.9877(5)                                                                                 | 17.9353(7)                                                                                 |
| <i>c</i> , Å                                                 | 11.8081(6)                                                                     | 13.2388(4)                                                                                 | 13.0839(5)                                                                                 |
| $\alpha$ , °                                                 | 81.253(5)                                                                      | 90                                                                                         | 90                                                                                         |
| $\beta$ , °                                                  | 68.994(6)                                                                      | 98.833(3)                                                                                  | 99.054(4)                                                                                  |
| $\gamma$ , °                                                 | 72.993(6)                                                                      | 90                                                                                         | 90                                                                                         |
| <i>V</i> , Å <sup>3</sup>                                    | 1001.27(12)                                                                    | 2490.28(13)                                                                                | 2438.30(16)                                                                                |
| <i>Z</i>                                                     | 1                                                                              | 2                                                                                          | 2                                                                                          |
| <i>F</i> (000)                                               | 514                                                                            | 1208                                                                                       | 1212                                                                                       |
| <i>D</i> (calc.), g/cm <sup>3</sup>                          | 1.699                                                                          | 1.608                                                                                      | 1.645                                                                                      |
| $\mu$ , mm <sup>-1</sup>                                     | 2.18                                                                           | 1.87                                                                                       | 2.04                                                                                       |
| Crystal size, mm                                             | 0.24 × 0.09 × 0.07                                                             | 0.51 × 0.11 × 0.10                                                                         | 0.35 × 0.10 × 0.07                                                                         |
| $\theta$ range for data collection, °                        | 1.9 < $\theta$ < 25.4                                                          | 1.9 < $\theta$ < 25.3                                                                      | 2.3 < $\theta$ < 25.4                                                                      |
| No. of reflections:                                          | 6947                                                                           | 11900                                                                                      | 11095                                                                                      |
| measured/independent/observed                                | 3667                                                                           | 4560                                                                                       | 4467                                                                                       |
| [ <i>I</i> > 2 $\sigma$ ( <i>I</i> )]                        | 3268                                                                           | 4021                                                                                       | 3777                                                                                       |
| <i>R</i> <sub>int</sub>                                      | 0.0278                                                                         | 0.0206                                                                                     | 0.0232                                                                                     |
| Index ranges                                                 | −10 < <i>h</i> < 10<br>−12 < <i>k</i> < 8<br>−14 < <i>l</i> < 14               | −12 < <i>h</i> < 12<br>−21 < <i>k</i> < 19<br>−15 < <i>l</i> < 11                          | −12 < <i>h</i> < 12<br>−21 < <i>k</i> < 20<br>−15 < <i>l</i> < 15                          |
| Final <i>R</i> indices [ <i>I</i> > 2 $\sigma$ ( <i>I</i> )] | 0.0331<br>0.0790                                                               | 0.0234<br>0.0545                                                                           | 0.0235<br>0.0495                                                                           |
| <i>R</i> indices<br>(all data)                               | 0.0396<br>0.0815                                                               | 0.0285<br>0.0569                                                                           | 0.0325<br>0.0521                                                                           |
| Goodness-of-fit on <i>F</i> <sup>2</sup>                     | 1.050                                                                          | 1.056                                                                                      | 1.027                                                                                      |
| Largest diff. peak/hole, e/Å <sup>3</sup>                    | 2.16/−0.89                                                                     | 0.53/−0.37                                                                                 | 0.77/−0.45                                                                                 |

Table S2. Single crystal XRD experiment and refinement details for **2<sub>Nd</sub>**, **2<sub>Sm</sub>**, **3**.

|                                                              | <b>2<sub>Nd</sub></b>                                                                      | <b>2<sub>Sm</sub></b>                                                                      | <b>3</b>                                                                             |
|--------------------------------------------------------------|--------------------------------------------------------------------------------------------|--------------------------------------------------------------------------------------------|--------------------------------------------------------------------------------------|
| Chemical formula                                             | C <sub>50.25</sub> H <sub>51.25</sub> N <sub>4.75</sub> Nd <sub>2</sub> O <sub>12.75</sub> | C <sub>50.25</sub> H <sub>51.25</sub> N <sub>4.75</sub> O <sub>12.75</sub> Sm <sub>2</sub> | C <sub>54</sub> H <sub>61.33</sub> N <sub>6</sub> Nd <sub>2</sub> O <sub>14.67</sub> |
| <i>M<sub>r</sub></i> , g/mol                                 | 1214.19                                                                                    | 1226.41                                                                                    | 1317.57                                                                              |
| Crystal system                                               | Monoclinic                                                                                 | Monoclinic                                                                                 | Trigonal                                                                             |
| Space group                                                  | <i>P</i> 2 <sub>1</sub> / <i>n</i>                                                         | <i>P</i> 2 <sub>1</sub> / <i>n</i>                                                         | <i>R</i> $\bar{3}$                                                                   |
| Temperature, K                                               | 170                                                                                        | 170                                                                                        | 100                                                                                  |
| <i>a</i> , Å                                                 | 10.5234(4)                                                                                 | 10.4751(4)                                                                                 | 37.790(5)                                                                            |
| <i>b</i> , Å                                                 | 17.9568(6)                                                                                 | 17.8590(6)                                                                                 | 37.790(5)                                                                            |
| <i>c</i> , Å                                                 | 13.0405(5)                                                                                 | 12.9892(5)                                                                                 | 10.303(2)                                                                            |
| $\alpha$ , °                                                 | 90                                                                                         | 90                                                                                         | 90                                                                                   |
| $\beta$ , °                                                  | 98.916(3)                                                                                  | 98.735(3)                                                                                  | 90                                                                                   |
| $\gamma$ , °                                                 | 90                                                                                         | 90                                                                                         | 120                                                                                  |
| <i>V</i> , Å <sup>3</sup>                                    | 2434.44(16)                                                                                | 2401.77(15)                                                                                | 12742(4)                                                                             |
| <i>Z</i>                                                     | 2                                                                                          | 2                                                                                          | 9                                                                                    |
| <i>F</i> (000)                                               | 1216                                                                                       | 1224                                                                                       | 5982                                                                                 |
| <i>D</i> (calc.), g/cm <sup>3</sup>                          | 1.656                                                                                      | 1.696                                                                                      | 1.545                                                                                |
| $\mu$ , mm <sup>-1</sup>                                     | 2.18                                                                                       | 2.49                                                                                       | 2.12                                                                                 |
| Crystal size, mm                                             | 0.79 × 0.14 × 0.11                                                                         | 0.33 × 0.11 × 0.09                                                                         | 0.70 × 0.20 × 0.20                                                                   |
| $\theta$ range for data collection, °                        | 2.0 < $\theta$ < 25.4                                                                      | 2.0 < $\theta$ < 25.3                                                                      | 2.7 < $\theta$ < 26.7                                                                |
| No. of reflections:                                          | 8388                                                                                       | 10347                                                                                      | 13340                                                                                |
| measured/independent/observed                                | 4471                                                                                       | 4404                                                                                       | 5107                                                                                 |
| [ <i>I</i> > 2 $\sigma$ ( <i>I</i> )]                        | 3895                                                                                       | 3813                                                                                       | 4819                                                                                 |
| <i>R</i> <sub>int</sub>                                      | 0.0343                                                                                     | 0.0251                                                                                     | 0.0323                                                                               |
| Index ranges                                                 | -12 < <i>h</i> < 7<br>-21 < <i>k</i> < 13<br>-15 < <i>l</i> < 14                           | -12 < <i>h</i> < 12<br>-21 < <i>k</i> < 17<br>-10 < <i>l</i> < 15                          | -45 < <i>h</i> < 45<br>-25 < <i>k</i> < 45<br>-12 < <i>l</i> < 10                    |
| Final <i>R</i> indices [ <i>I</i> > 2 $\sigma$ ( <i>I</i> )] | 0.0317<br>0.0743                                                                           | 0.0253<br>0.0551                                                                           | 0.0393<br>0.0939                                                                     |
| <i>R</i> indices<br>(all data)                               | 0.0382<br>0.0794                                                                           | 0.0326<br>0.0575                                                                           | 0.0417<br>0.0950                                                                     |
| Goodness-of-fit on <i>F</i> <sup>2</sup>                     | 1.072                                                                                      | 1.051                                                                                      | 1.093                                                                                |
| Largest diff. peak/hole, e/Å <sup>3</sup>                    | 1.09/-1.10                                                                                 | 0.68/-0.58                                                                                 | 1.19/-1.35                                                                           |

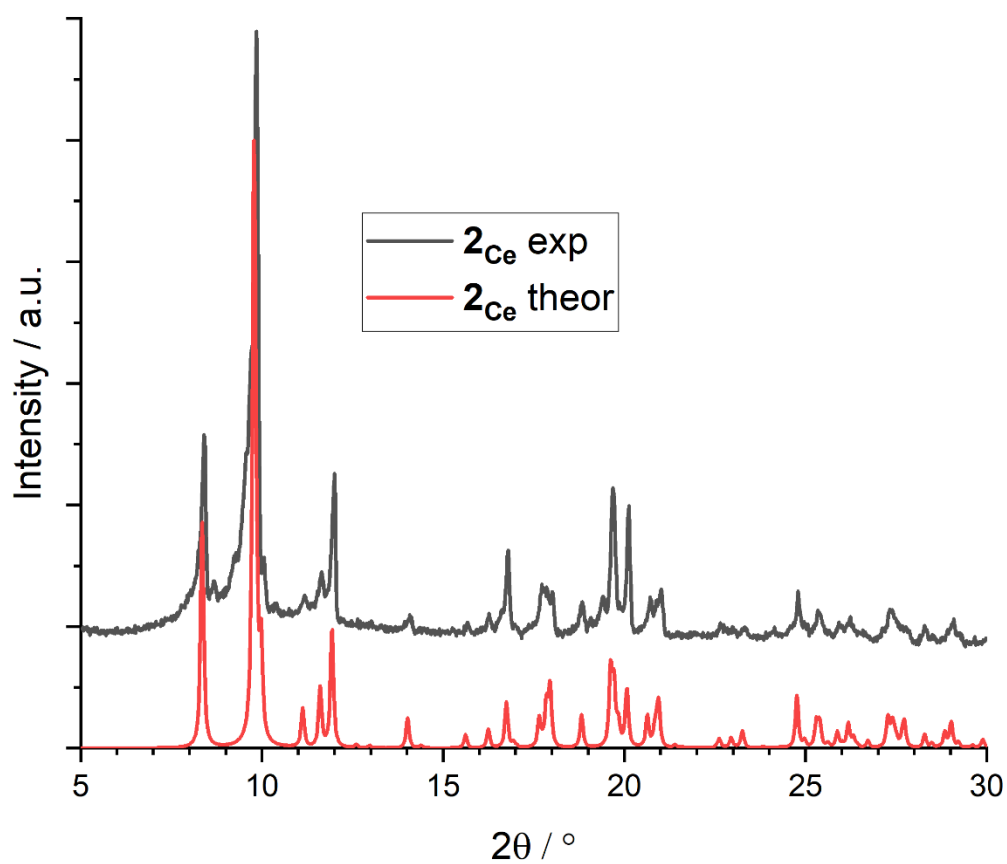

Figure S1. Experimental (black) and theoretical (red) PXRD patterns for  $2_{ce}$ .

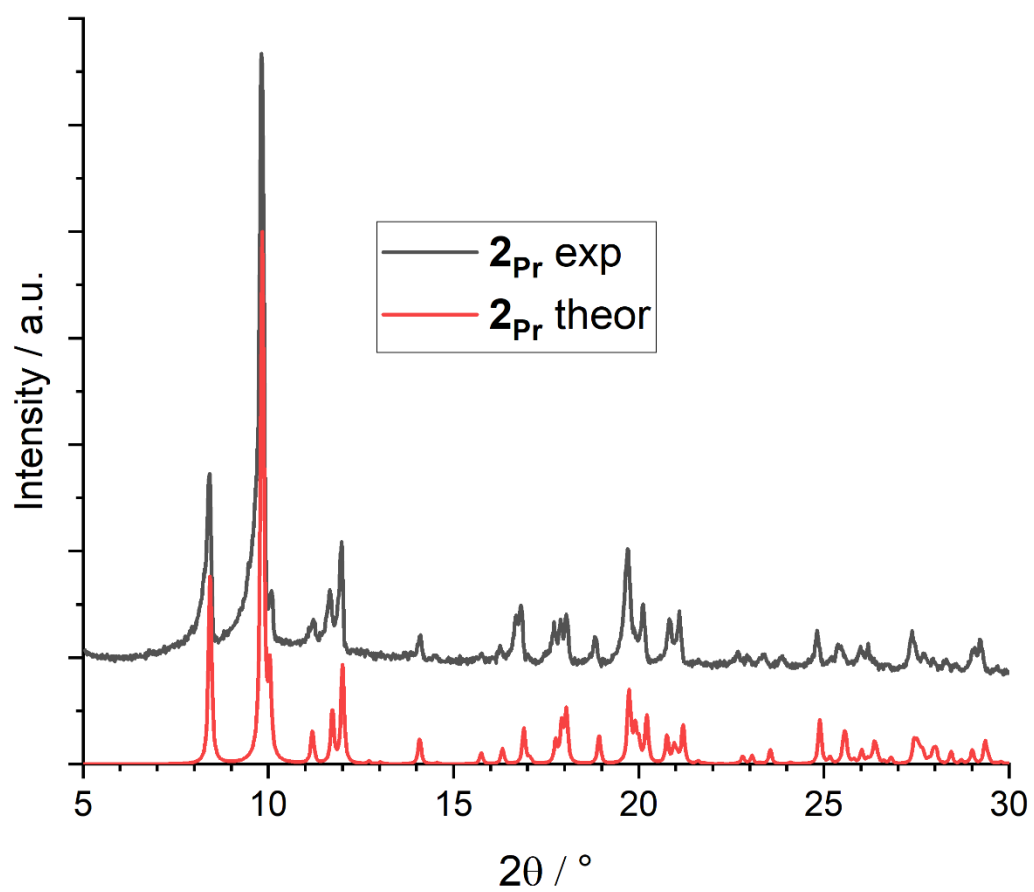

Figure S2. Experimental (black) and theoretical (red) PXRD patterns for  $2_{Pr}$ .

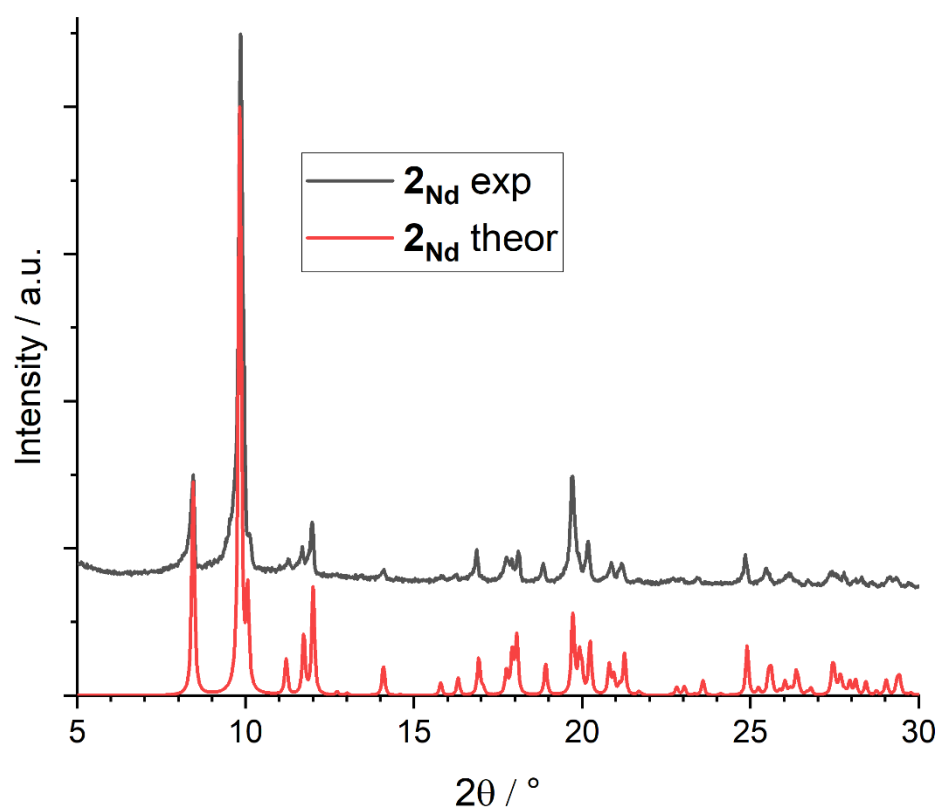

Figure S3. Experimental (black) and theoretical (red) PXRD patterns for  $2\text{Nd}$ .

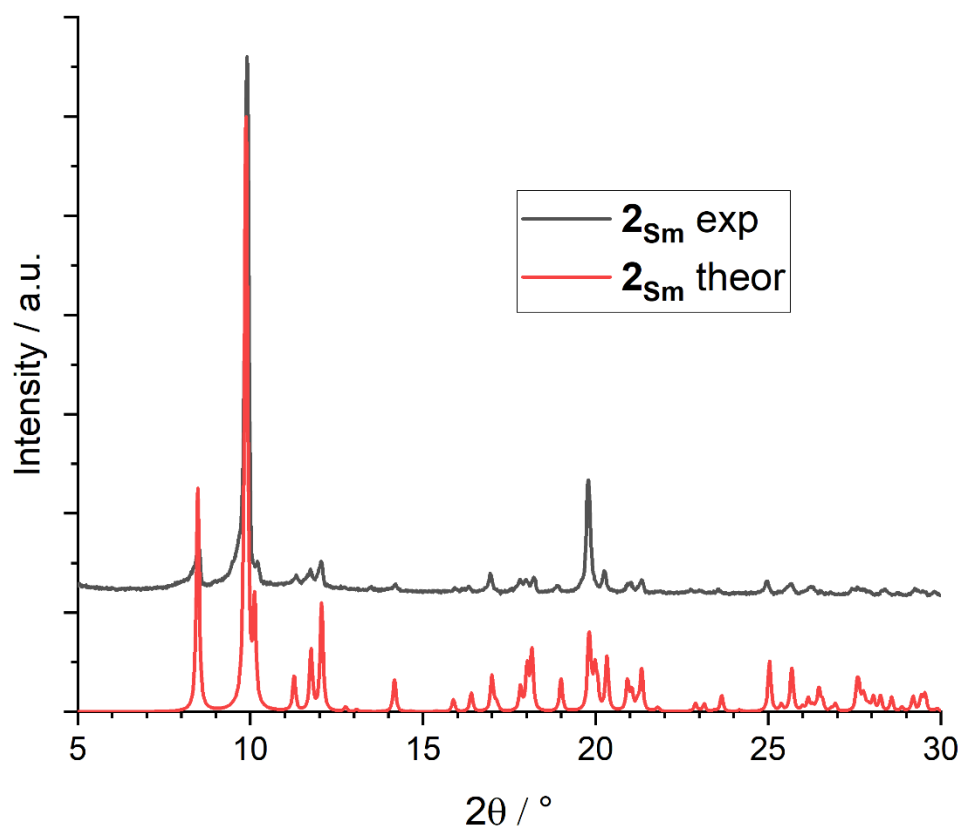

Figure S4. Experimental (black) and theoretical (red) PXRD patterns for  $2\text{Sm}$ .

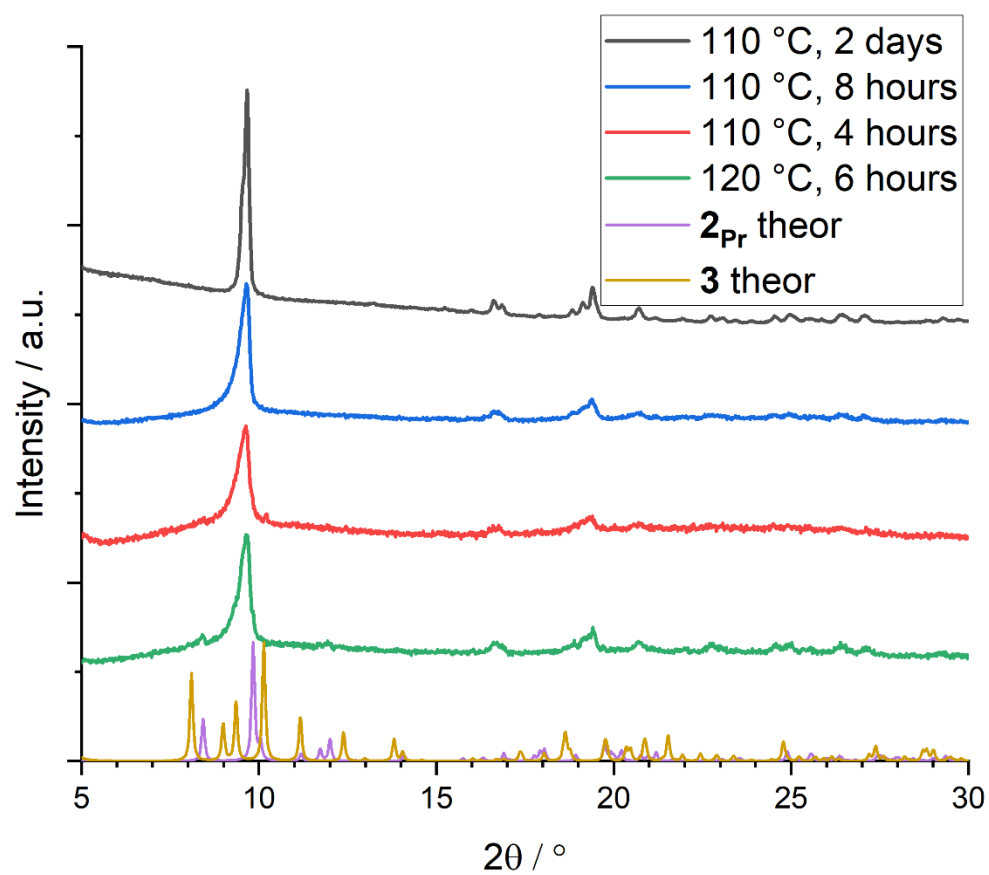

Figure S5. PXRD patterns for **2<sub>Pr</sub>** temperature- and time-screening syntheses.

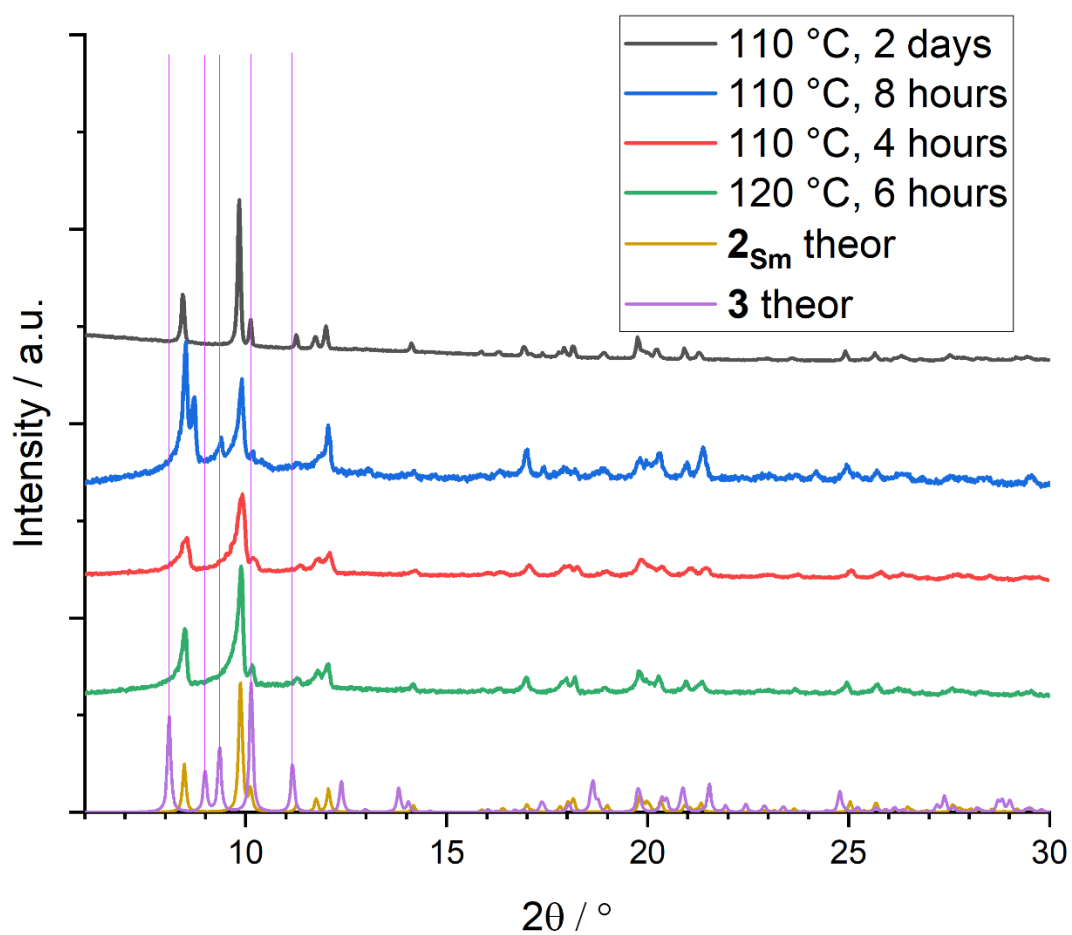

Figure S6. PXRD patterns for **2<sub>sm</sub>** temperature- and time-screening syntheses. Magenta lines show positions for lowest-angle reflections in theoretical **3** structure.

## Description of 1' compound

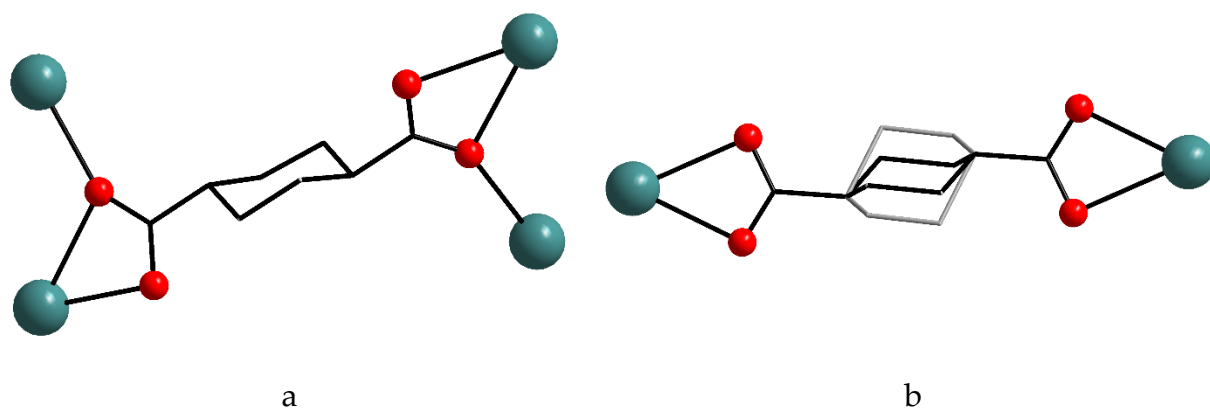

Figure S7. Coordination modes of  $(\kappa^2, \kappa^1; \kappa^2, \kappa^1)$ -chdc ligand (a) and  $(\kappa^2; \kappa^2)$ -chdc ligand (b). Cyclohexane ring in (b) is disordered over two positions, the second position is shown grey.

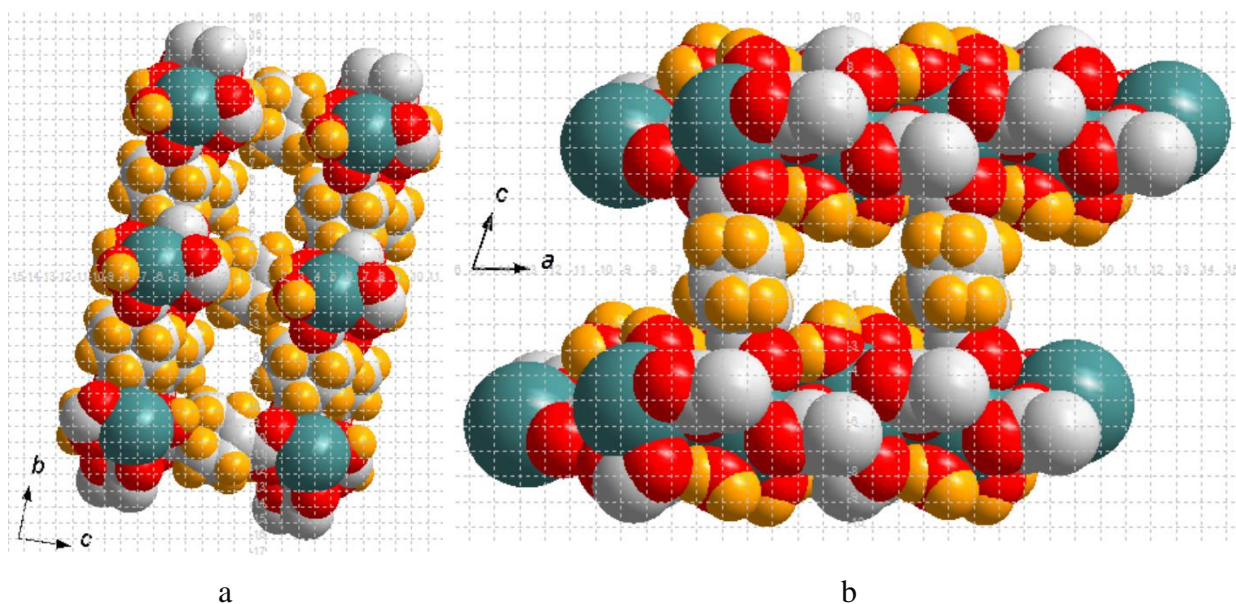

Figure S8. Space-filling representation of channels in the coordination framework of 1. Grids with 1 Å step are imposed on both the figures.

PXRD pattern obtained for the filtered sample of 1' shows the disappearance of most of the peaks presented in the theoretical pattern. However, a detailed analysis of the indexed diffractogram (see figure S1a) gives necessary insights into the nature of molecular mobility in the crystal structure of 1. First two reflections appearing at *ca.* 8.0° and 8.8° on the theoretical diffractogram contain the reflections of crystallographic planes with (0 0 1) and (0 1 0) Miller indexes, respectively. The corresponding interplanar distances are mainly controlled by  $(\kappa^2; \kappa^2)$ -chdc ligand (fig. 2c) and  $(\kappa^2, \kappa^1; \kappa^2, \kappa^1)$ -chdc ligand, respectively. On the experimental diffractogram, the intensity of (0 0 1) reflection is significantly decreased and the peak is shifted to  $2\theta \approx 8.1^\circ$ , while (0 1 0) reflection remains intact. At larger angles, the only intensive peak at  $2\theta \approx 17.6^\circ$  presents, which corresponds to (0 2 0) plane. Such analysis suggests that desolvation of 1 when stored in air leads to a contraction of  $[\text{La}_2(\text{H}_2\text{O})_4(\text{chdc})_3]$  3D framework along *c* crystallographic axis, which is attributed to the  $(\kappa^2; \kappa^2)$ -chdc ligand. On the contrary, the framework structure retains along *b* axis, which corresponds to more robustly coordinated  $(\kappa^2, \kappa^1; \kappa^2, \kappa^1)$ -chdc. These observations are also supported by a larger space which is accessible for  $(\kappa^2; \kappa^2)$ -chdc molecular motions (see figure 2c) instead of  $(\kappa^2, \kappa^1; \kappa^2, \kappa^1)$ -chdc ligands, closely packed to each other (see figure S9b).

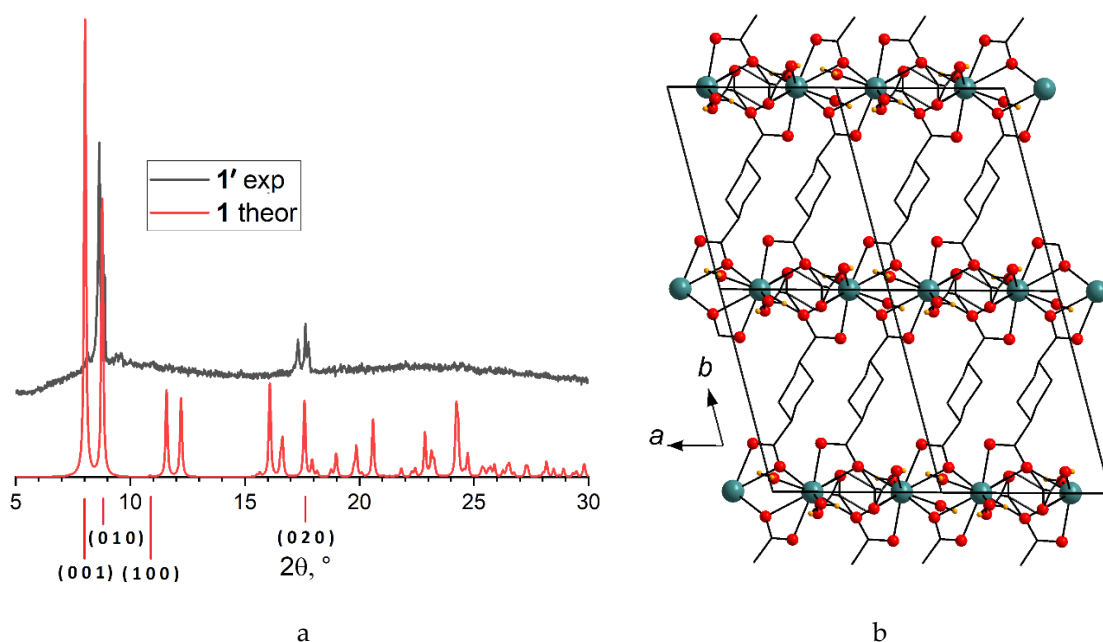

Figure S9. Experimental (black) PXRD pattern for **1'** and theoretical (red) one for **1** (a). View along *c* crystallographic axis in **1** (b). Atom colors correspond to figure 3 in the manuscript, H atoms of chdc ligand and guest molecules are not shown.

IR spectrum of **1'** (Fig. S11) contains characteristic absorption bands for water O–H vibrations, cyclohexane ring and DMF methyl group C(sp<sup>3</sup>)–H vibrations, DMF C=O vibrations and COO group antisymmetric and symmetric stretchings. The absence of aromatic C(sp<sup>2</sup>)–H absorption bands in 3075–3060 cm<sup>−1</sup> region, as well as the absence of strong bands at *ca.* 1583, 1534 and 850 cm<sup>−1</sup> confirm the absence of phenanthroline in **1'** in any (coordinated or guest) form, fully matching crystal structure data obtained for its parent compound **1**.

According to TG (fig. S10), first 13 % weight loss step for **1'** occurs at *ca.* 280 °C, which corresponds well to the evaporation of the residual coordinated solvents. The second weight loss step occurs at *ca.* 505 °C and is apparently attributed to the decomposition of La-chdc coordination framework.

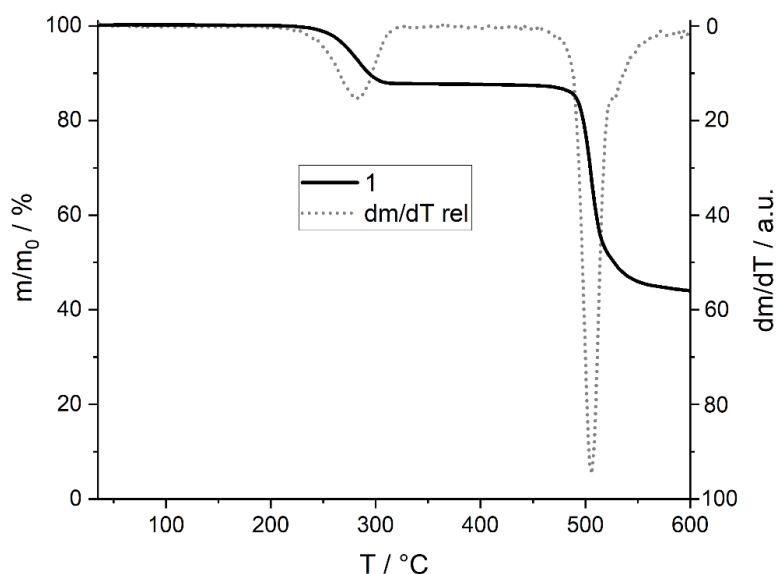

Figure S10. TGA pattern and relative dm/dT curve for the sample **1'**.

## Bond lengths in metal environment

Table S3. Selected bond lengths in **2<sub>Ln</sub>** and **3**.

| Bond                             | <b>2<sub>Ce</sub></b> | <b>2<sub>Pr</sub></b> | <b>2<sub>Nd</sub></b> | <b>2<sub>Sm</sub></b> | <b>3 (Nd)</b> |
|----------------------------------|-----------------------|-----------------------|-----------------------|-----------------------|---------------|
| Ln–O( $\kappa^2$ -COO)           | 2.530(2)              | 2.508(2)              | 2.502(3)              | 2.478(2)              | 2.471(3)      |
|                                  | 2.553(2)              | 2.526(2)              | 2.516(3)              | 2.481(3)              | 2.490(3)      |
| Ln–O( $\kappa^1, \kappa^1$ -COO) | 2.437(2)              | 2.418(2)              | 2.402(3)              | 2.374(2)              | 2.414(3)      |
|                                  | 2.487(2)              | 2.4706(19)            | 2.456(3)              | 2.422(2)              | 2.437(3)      |
| Ln–O( $\kappa^2, \kappa^1$ -COO) | 2.4172(18)            | 2.3965(19)            | 2.383(2)              | 2.351(2)              | 2.413(3)      |
|                                  | 2.572(2)              | 2.553(2)              | 2.540(3)              | 2.495(2)              | 2.561(3)      |
|                                  | 2.6151(17)            | 2.5803(18)            | 2.573(2)              | 2.551(2)              | 2.565(3)      |
| Ln–N(phen)                       | 2.639(14)             | 2.600(12)             | 2.581(15)             | 2.552(12)             | 2.617(4)      |
|                                  | ...                   | ...                   | ...                   | ...                   | ...           |
|                                  | 2.70(3)               | 2.70(3)               | 2.67(3)               | 2.61(2)               | 2.71(4)       |

## Infrared spectra and TGA details

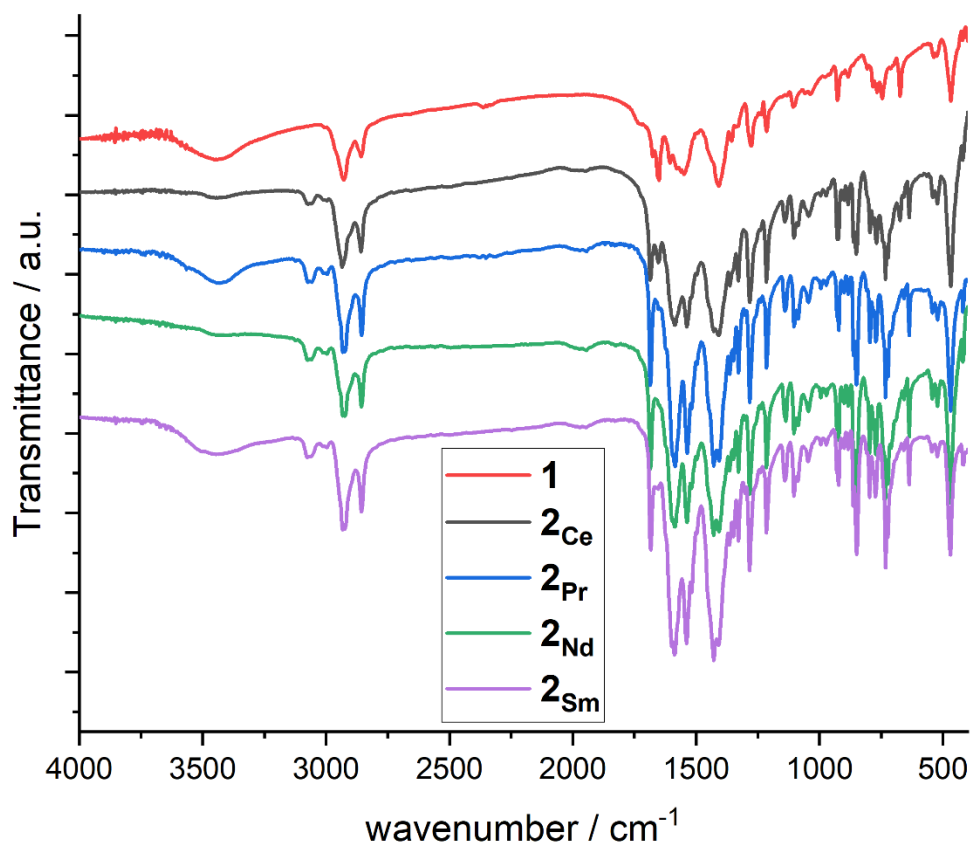

Figure S11. Infrared spectra for 1' and 2<sub>Ln</sub>.

Table S4. Details on TG decomposition steps of 1' and 2<sub>Ln</sub>.

| Compound        | Solvent loss |                |                    | Framework decomposition |                |                    | Ln <sub>2</sub> O <sub>3</sub> calcd. residue / % |
|-----------------|--------------|----------------|--------------------|-------------------------|----------------|--------------------|---------------------------------------------------|
|                 | T range / °  | Max.loss T / ° | Weight residue / % | T start / °             | Max.loss T / ° | Weight residue / % |                                                   |
| 1'              | 220 – 320    | 280            | 87                 | ~ 460                   | 505            | 44                 | 36                                                |
| 2 <sub>Ce</sub> | 25 – 400     | -              | 95                 | ~ 400                   | 470, 495       | 43                 | 27<br>(28 for CeO <sub>2</sub> )                  |
| 2 <sub>Pr</sub> | 230 – 430    | -              | 95.5               | ~ 410                   | 470, 485, 505  | 34                 | 27                                                |
| 2 <sub>Nd</sub> | 250 – 440    | -              | 96                 | ~ 415                   | 495, 510       | 38                 | 28                                                |
| 2 <sub>Sm</sub> | 250 – 450    | -              | 96                 | ~ 415                   | 490, 505       | 39                 | 28                                                |

# Luminescence supplementary data

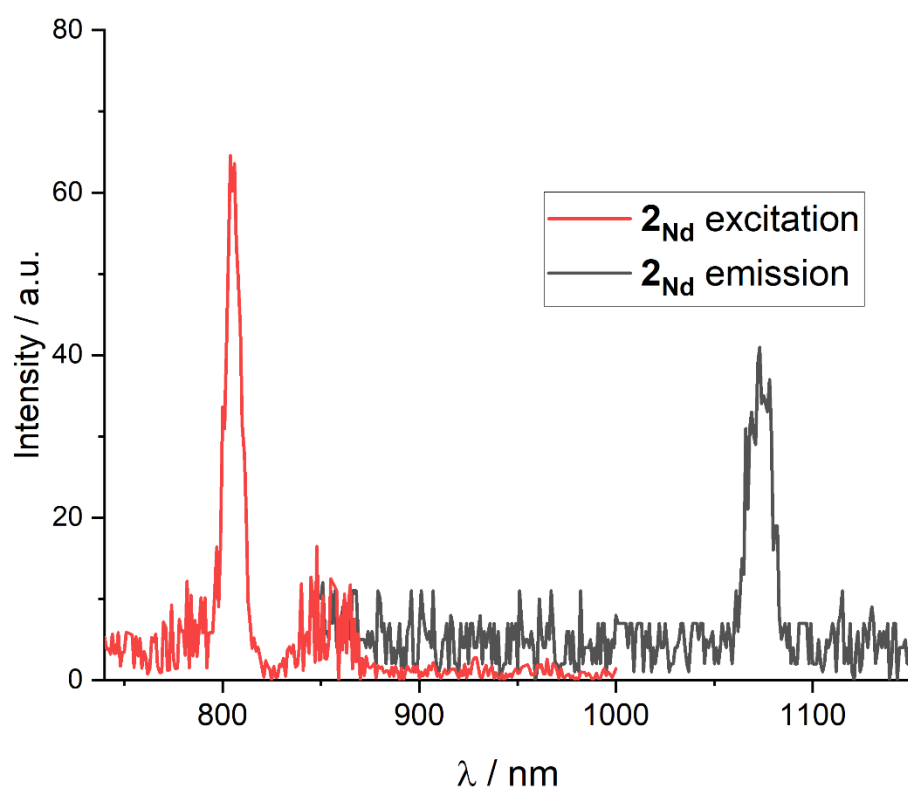

Figure S12. Excitation (red) spectrum for  $2\text{Nd}$  at  $\lambda_{\text{em}} = 1077$  nm and emission (black) spectrum for  $2\text{Nd}$  at  $\lambda_{\text{ex}} = 804$  nm.

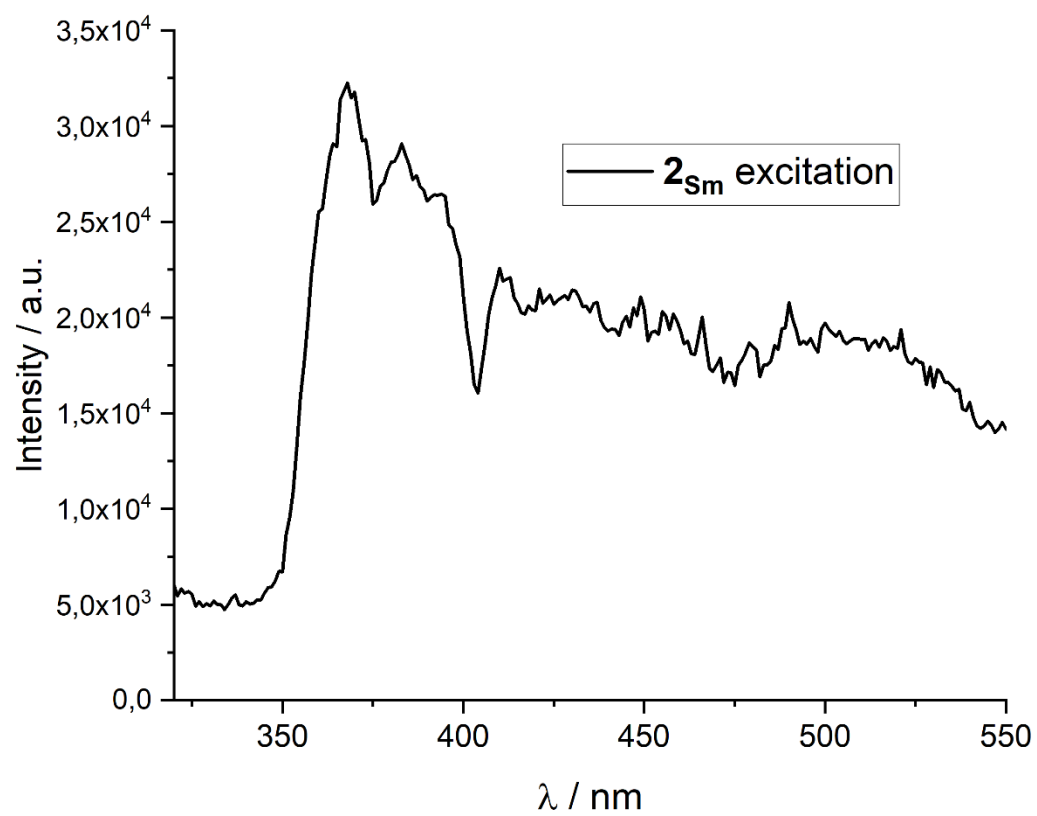

Figure S13. Excitation spectrum for  $2_{Sm}$  at  $\lambda_{em} = 580$  nm
